# Supplementary material for: Stimuli-responsive supramolecular materials: photo-tunable properties and molecular recognition behavior
Source: Royal Society of Chemistry journal article supplement (doi:10.1039/c5py01852h), 2015-12-01
Supplement: c5py01852h1.pdf [file c5py01852h1.pdf]

## Supporting Information for

### Stimuli-Responsive Supramolecular Materials: Photo-Tunable Properties and Molecular Recognition Behavior

Cheng-Wei Huang<sup>a</sup>, Pei-Wei Wu<sup>b</sup>, Wei-Hung Su,<sup>b</sup> Chao-Yuan Zhu<sup>a,\*</sup> and  
Shiao-Wei Kuo<sup>b,\*</sup>

<sup>a</sup>Institute of Applied Chemistry, National Chiao Tung University, Hsinchu, 300 Taiwan

E-mail: [cyzhu@mail.nctu.edu.tw](mailto:cyzhu@mail.nctu.edu.tw)

<sup>b</sup>Department of Materials and Optoelectronic Science, National Sun Yat-Sen University, Kaohsiung,  
804, Taiwan.

E-mail: [kuosw@faculty.nsysu.edu.tw](mailto:kuosw@faculty.nsysu.edu.tw)

## Experimental Section

### Materials

4-Vinylbenzyl chloride (VBC; Aldrich) was distilled from  $\text{CaH}_2$  under reduced pressure. Propargyl bromide (80% in toluene, stabilized with  $\text{MgO}$ ) was obtained from Alfa. All solvents were purchased from TEDIA (USA) and distilled over  $\text{CaH}_2$  prior to use. Commercially available reagents were obtained from Sigma–Aldrich or Showa and used as received.

### Propargyl thymine

A mixture of thymine (10.0 g, 80.0 mmol) and  $\text{K}_2\text{CO}_3$  (16.3 g, 118 mmol) in DMF (250 mL) was stirred for 3 h and then cooled to 0 °C. Propargyl bromide (7.27 mL, 96.0 mmol) was added dropwise and then the reaction mixture was stirred for 24 h. After filtering off the salts and evaporating the solvent, the residue was purified through column chromatography (EtOAc/*n*-hexane, 2:1) to give a pale-yellow powder (10.5 g, 80%).  $^1\text{H}$  NMR (500 MHz,  $\text{CDCl}_3$ ,  $\delta$ , ppm): 9.21 (br, 1H, NH), 7.28 (s, 1H, thymine H-6), 4.56 (d, 2H,  $\text{CH}_2$  of propargyl), 2.48 (t, 1H, CH), 1.97 (s, 3H,  $\text{CH}_3$ ).  $^{13}\text{C}$  NMR (500 MHz,  $\text{CDCl}_3$ ,  $\delta$ , ppm): 164.0, 150.4, 138.3, 111.5, 76.2, 75.2, 36.5, 12.1.

### 11-Azidoundecanoic acid (Az-acid)

$\text{NaN}_3$  (1.50 g, 23.1 mmol) and 11-bromoundecanoic acid (5.30 g, 19.2 mmol) were placed in a two-necked reaction flask equipped with a condenser. DMSO (200 mL) was added and then the mixture was stirred at room temperature for 20 h. The solids were filtered off and the solution partitioned between EtOAc (100 mL) and saturated aqueous  $\text{NaHCO}_3$  (100 mL); the organic phase was washed with D.I. water ( $3 \times 100$  mL), dried ( $\text{MgSO}_4$ ), and concentrated through rotary evaporation to give a white solid. (4.20 g, 96%)  $^1\text{H}$  NMR (500 MHz,  $\text{CDCl}_3$ ,  $\delta$ , ppm): 3.25 (t, 2H,  $\text{CH}_2\text{N}_3$ ), 2.34 (t, 2H,  $\text{CH}_2\text{CO}_2\text{H}$ ), 1.54–1.66 (m, 4H,  $\text{CH}_2\text{CH}_2\text{CO}_2\text{H}$ ), 1.22–1.39 [m, 12H,  $(\text{CH}_2)_6$ ], 0.93 (t, 3H,  $\text{CH}_3$ ).  $^{13}\text{C}$  NMR (500 MHz,  $\text{CDCl}_3$ ,  $\delta$ , ppm): 180.1, 51.4, 34.0, 29.4, 29.3, 29.2, 29.1, 29.0, 28.8, 26.7, 24.6.

#### **4-(Phenyldiazenyl)phenyl 11-azidoundecanoate (Azo-Az)**

A solution of Az-acid (5.00 g, 22.0 mmol) was heated under reflux in SOCl<sub>2</sub> (25 mL) for 1 h. Unreacted SOCl<sub>2</sub> was then evaporated under reduced pressure and the residue dissolved in dry THF (20 mL). This solution was added dropwise to a solution of **4-phenylazophenol** (3.63 g, 18.3 mmol) and Et<sub>3</sub>N (2.19 g, 21.6 mmol) in dry THF (60 mL) under a N<sub>2</sub> atmosphere and then the mixture was stirred overnight. After filtration, the filtrate was concentrated and the residue dissolved in DCM. This solution was washed with D.I. water (3×) and dried (MgSO<sub>4</sub>). The crude product was purified through reprecipitation into water two times to afford a yellow solid (5.97 g, 80%). <sup>1</sup>H NMR (500 MHz, CDCl<sub>3</sub>, δ, ppm): 7.95 (d, 2H, ArH), 7.90 (d, 2H, ArH), 7.51 (m, 2H, ArH), 7.47 (d, 2H, ArH), 7.24 (d, 1H, ArH), 3.25 (t, 2H, CH<sub>2</sub>N<sub>3</sub>), 2.59 (t, 2H, CH<sub>2</sub>COO), 1.77 (tt, 2H, CH<sub>2</sub>CH<sub>2</sub>COO), 1.59 (m, 2H, CH<sub>2</sub>CH<sub>2</sub>COO), 1.22–1.39 [m, 12H, (CH<sub>2</sub>)<sub>6</sub>]. <sup>13</sup>C NMR (500 MHz, CDCl<sub>3</sub>, δ, ppm): 171.9, 152.8, 152.5, 131.0, 129.1, 124.0, 122.8, 122.2, 51.4, 34.5, 29.4, 29.3, 29.2, 29.1, 29.0, 28.8, 26.7, 24.6.

#### **Azo-T**

A solution of Azo-Az (1.00 g, 2.46 mmol), propargyl thymine (0.800 g, 5.00 mmol), and PMDETA (50 μL) in dry DMF (40 mL) was subjected to three freeze/pump/thaw cycles. The flask was filled with N<sub>2</sub> and Cu(I)Br (30 mg) was quickly added. The mixture was stirred at 40 °C for 24 h and then the solvent was evaporated under reduced pressure. The residue was dissolved in DCM, washed with D.I. water, and purified through column chromatography (EtOAc/*n*-hexane, 1:4) to give a yellow powder (1.27 g, 90%) <sup>1</sup>H NMR (500 MHz, CDCl<sub>3</sub>, δ, ppm): 8.41 (br, 1H, NH), 7.95 (d, 2H, ArH), 7.90 (d, 2H, ArH), 7.64 (s, 1H, thymine H-6), 7.55–7.41 (m, 4H, ArH), 7.33 (s, 1H, triazole), 7.24 (d, 2H, ArH), 4.93 (s, 2H, ArCH<sub>2</sub>N), 4.31 (t, 2H, CH<sub>2</sub>CH<sub>2</sub>N), 2.58 (t, 2H, CH<sub>2</sub>COO), 1.88 (s, 3H, thymine CH<sub>3</sub>), 1.75 (tt, 2H, CH<sub>2</sub>CH<sub>2</sub>COO), 1.59 (m, 2H, CH<sub>2</sub>CH<sub>2</sub>COO), 1.22–1.39 [m, 12H,

(CH<sub>2</sub>)<sub>6</sub>]. <sup>13</sup>C NMR (500 MHz, CDCl<sub>3</sub>, δ, ppm): 171.9, 163.7, 152.7, 152.5, 150.6, 150.2, 142.0, 140.2, 131.1, 129.0, 124.0, 123.3, 122.8, 122.2, 111.2, 50.6, 43.0, 34.5, 30.2, 29.4, 29.3, 29.2, 29.1, 29.0, 28.9, 26.4, 24.9. ESI-MS [M + Na]<sup>+</sup>: calcd, *m/z* 594.28; found, 594.28 (the ESI mass spectrum is displayed in Fig. S8).

### **Prop-2-ynyl 4-(6-acetamidopyridin-2-ylamino)-4-oxobutanoate (SA-DAP)**

A solution of 4-oxo-4-(prop-2-ynyloxy)butanoic acid (2.84, 18.2 mmol) in SOCl<sub>2</sub> (20 mL) was heated under reflux and then concentrated under vacuum distillation. The generated acid chloride was then mixed with *N*-(6-aminopyridin-2-yl)acetamide (3.30 g, 21.8 mmol) and Et<sub>3</sub>N (1.65 mL) in dry THF (50 mL). When the reaction was complete (TLC), the mixture was filtered and the filtrate partitioned between DCM and saturated NaHCO<sub>3</sub>. The organic phase was dried (MgSO<sub>4</sub>) and concentrated. The residue was purified through column chromatography (EA) and dried under vacuum to give a white powder (4.1 g, 79%). <sup>1</sup>H NMR (500 MHz, DMSO-*d*<sub>6</sub>, δ, ppm): 10.12 (s, 1H, NH), 10.06 (s, 1H, NH), 7.69 (m, 3H, ArH), 4.69 (d, 2H, CH<sub>2</sub>COO), 3.53 (s, 1H, CH), 2.71 (t, 2H, CH<sub>2</sub>CONH), 2.63 (t, 2H, CH<sub>2</sub>COO), 7.24 (d, 2H, ArH), 4.93 (s, 2H, ArCH<sub>2</sub>N), 4.31 (t, 2H, CH<sub>2</sub>CH<sub>2</sub>N), 2.10 (s, 3H, CH<sub>3</sub>). <sup>13</sup>C NMR (500 MHz, DMSO-*d*<sub>6</sub>, δ, ppm): 172.6, 171.6, 170.2, 151.0, 140.6, 109.4, 78.9, 78.1, 52.1, 30.8, 28.4, 24.1. ESI-MS [M + Na]<sup>+</sup>: calcd, *m/z* 312.10; found, 312.10 (the ESI mass spectrum is displayed in Fig. S9).

### **PVBC homopolymer**

VBC (3.05 g, 20.0 mmol), benzoyl peroxide (41.8 mg, 0.200 mmol), and TEMPO (32.2 mg, 0.260 mmol) were charged in a reaction flask. After degassing through three freeze/pump/thaw cycles, the mixture was heated at 95 °C for 3 h under vacuum and then at 120 °C until the required molecular weight had been achieved. The mixture was quickly cooled to room temperature and diluted with THF. The solid that precipitated from MeOH was dried under vacuum overnight. <sup>1</sup>H NMR (500

MHz, CDCl<sub>3</sub>,  $\delta$ , ppm): 7.04 (br, 2H, ArH), 6.48 (br, 2H, ArH), 4.52 (br, 2H, CH<sub>2</sub>Cl), 1.70 (br, 2H, CH<sub>2</sub>), 1.38 (br, 2H, CH<sub>2</sub>). <sup>13</sup>C NMR (500 MHz, CDCl<sub>3</sub>,  $\delta$ , ppm): 145.8, 135.6, 128.5, 46.5, 44.0, 40.5.

### **PVBaz**

NaN<sub>3</sub> (1.00 g, 15.4 mmol) was added to a solution of PVBC (1.64 g, 10.6 mmol of VBC repeating units) in DMF (80 mL) and then the mixture was stirred at 60 °C for 48 h. The solvent was evaporated under reduced pressure and the residue dissolved in DCM. The solution was washed with D.I. water (3 $\times$ ), dried (MgSO<sub>4</sub>), concentrated, and precipitated into MeOH to afford a pale-yellow powder (1.58 g, 96%), <sup>1</sup>H NMR (500 MHz, CDCl<sub>3</sub>,  $\delta$ , ppm): 6.98 (br, 2H, ArH), 6.47 (br, 2H, ArH), 4.25 (br, 2H, CH<sub>2</sub>N<sub>3</sub>), 1.69 (br, 2H, CH<sub>2</sub>), 1.41 (br, 2H, CH<sub>2</sub>). <sup>13</sup>C NMR (500 MHz, CDCl<sub>3</sub>,  $\delta$ , ppm): 145.8, 133.4, 128.6, 54.7, 44.1, 40.5.

### **PVB-DAP**

A solution of PVBaz (0.500 g, 3.10 mmol of N<sub>3</sub>), SA-DAP (1.21 g, 4.18 mmol), and Cu(I)Br (9.00 mg, 0.0630 mmol) in DMF (60 mL) was subjected to three freeze/pump/thaw cycles. PMDETA (10  $\mu$ L) was added and the flask was filled with N<sub>2</sub>. The mixture was stirred at room temperature for 24 h and then was passed through a short column of neutral aluminum oxide, followed by dialysis with 0.5 M HCl and MeOH to remove the catalyst. The crude product was precipitated into MeOH to give an off-white powder (0.57g, 75%). <sup>1</sup>H NMR (500 MHz, CDCl<sub>3</sub>,  $\delta$ , ppm): 10.28 (br, 1H, NH), 10.21 br, 1H, NH), 8.15 (br, 1H, triazole), 7.63 (br, 3H, ArH), 6.91 (br, 2H, ArH), 6.41 (br, 2H, ArH), 5.45 (br, ArCH<sub>2</sub>N), 5.08 (br, 2H, CH<sub>2</sub>N<sub>3</sub>), 2.68 (t, 2H, CH<sub>2</sub>CONH), 2.55 (t, 2H, CH<sub>2</sub>COO), 2.10 (br, 3H, CH<sub>3</sub>), 1.69 (br, 2H, CH<sub>2</sub>), 1.41 (br, 2H, CH<sub>2</sub>). <sup>13</sup>C NMR (500 MHz, CDCl<sub>3</sub>,  $\delta$ , ppm): 173.1, 171.9, 170.5, 150.7, 150.5, 142.8, 141.1, 133.7, 128.2, 125.5, 109.3, 57.6, 52.7, 40.3, 40.2, 30.8, 28.4, 24.1.

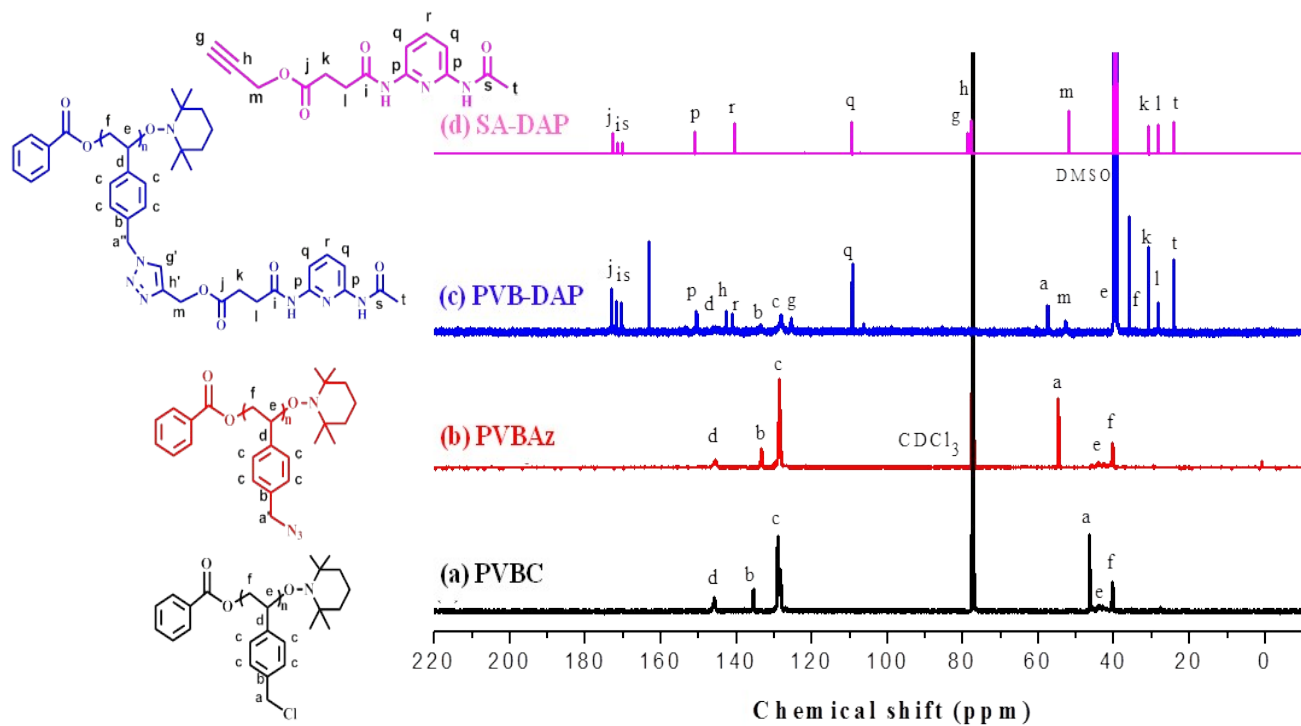

**Fig. S1:**  $^{13}\text{C}$  NMR spectra of (a) PVBC and (b) PVBAz in  $\text{CDCl}_3$  and of (c) PVB-DAP and (d) SA-DAP in  $\text{DMSO}-d_6$ .

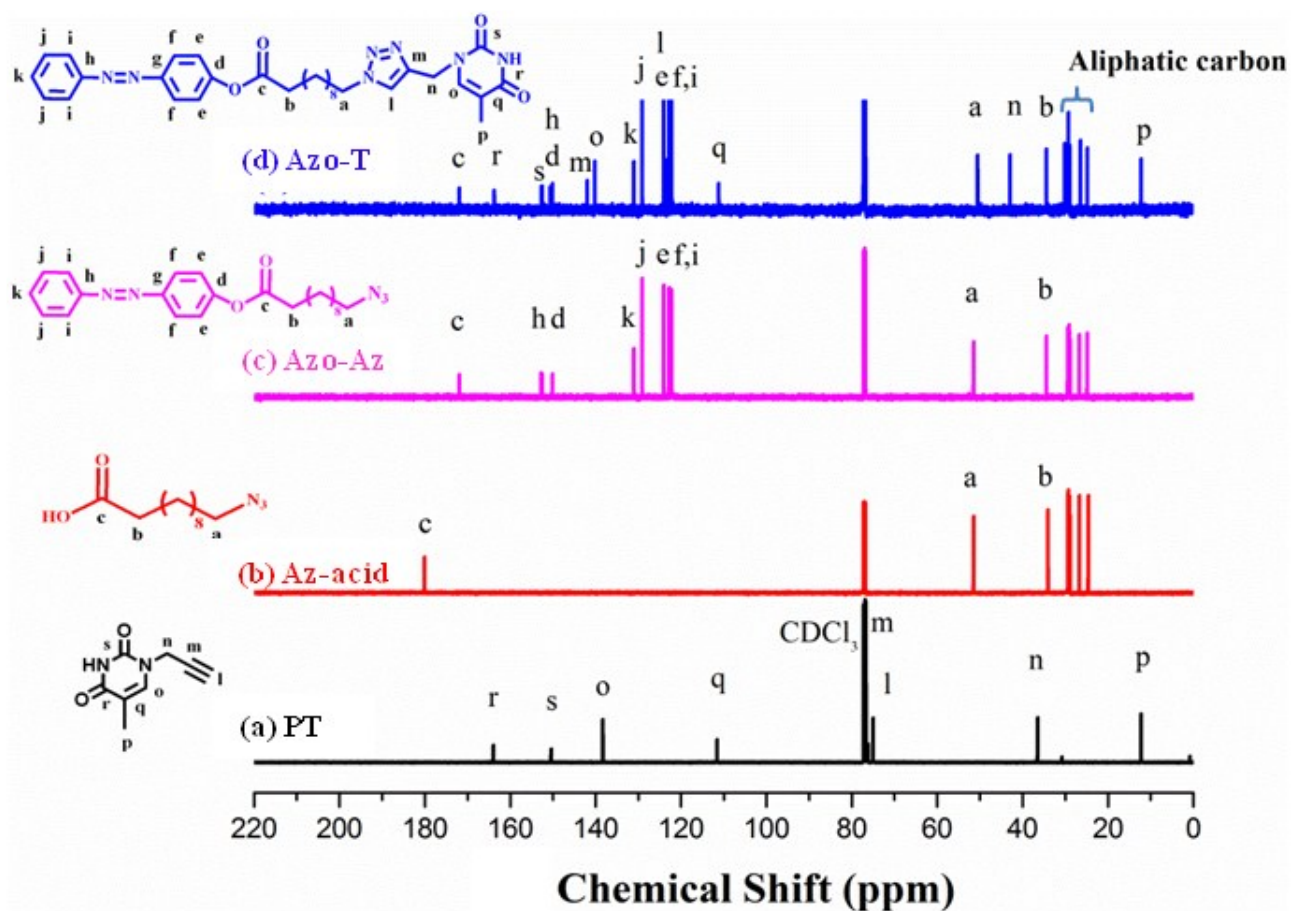

**Fig. S2:**  $^{13}\text{C}$  NMR spectra of (a) PT and (b) Az-acid and of (c) Azo-Az and (d) Azo-T in  $\text{CDCl}_3$ .

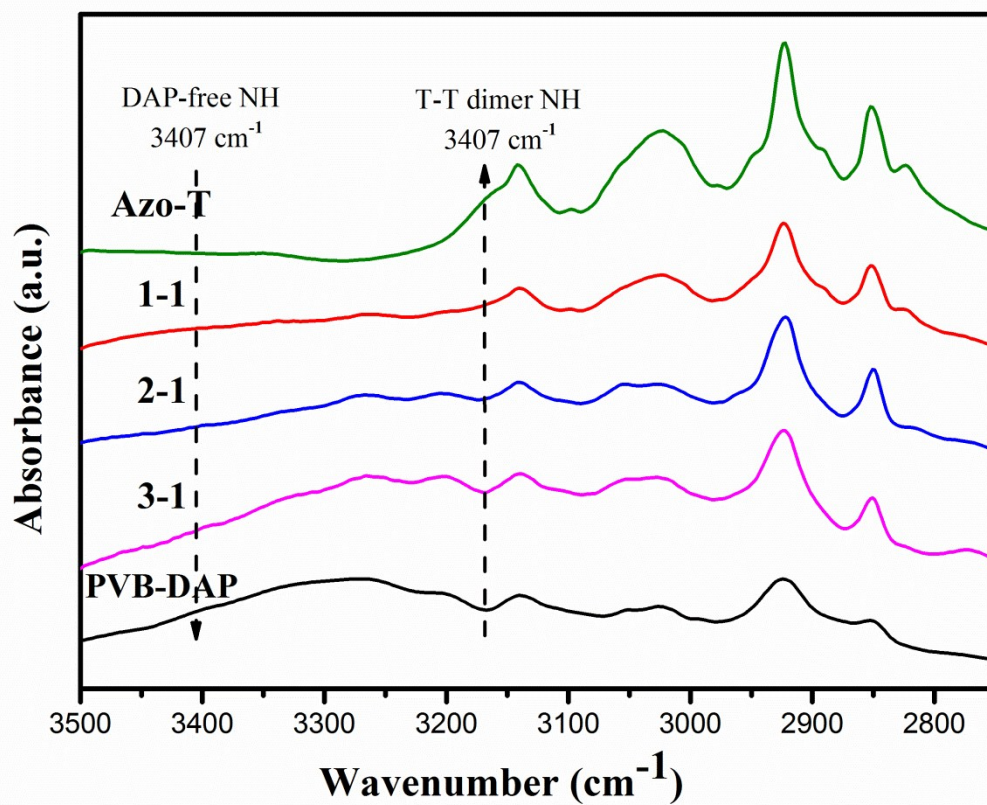

**Fig. S3:** FTIR spectrum of the PVB-DAP/Azo-T blend system in the range 2750–3500  $\text{cm}^{-1}$ .



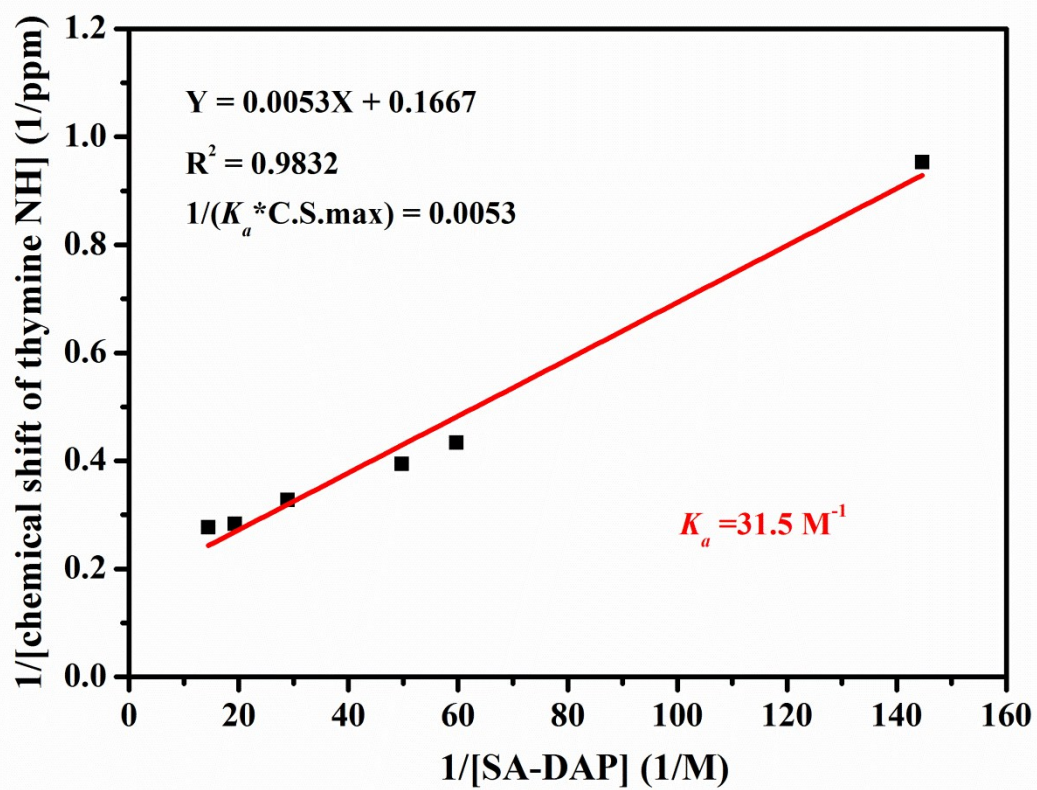

**Fig. S4:** Benesi-Hildebrand plots for calculation of the association constant of Azo-T/SA-DAP in 1,1,2,2-tetrachloroethane- $d_2$  at 25 °C.

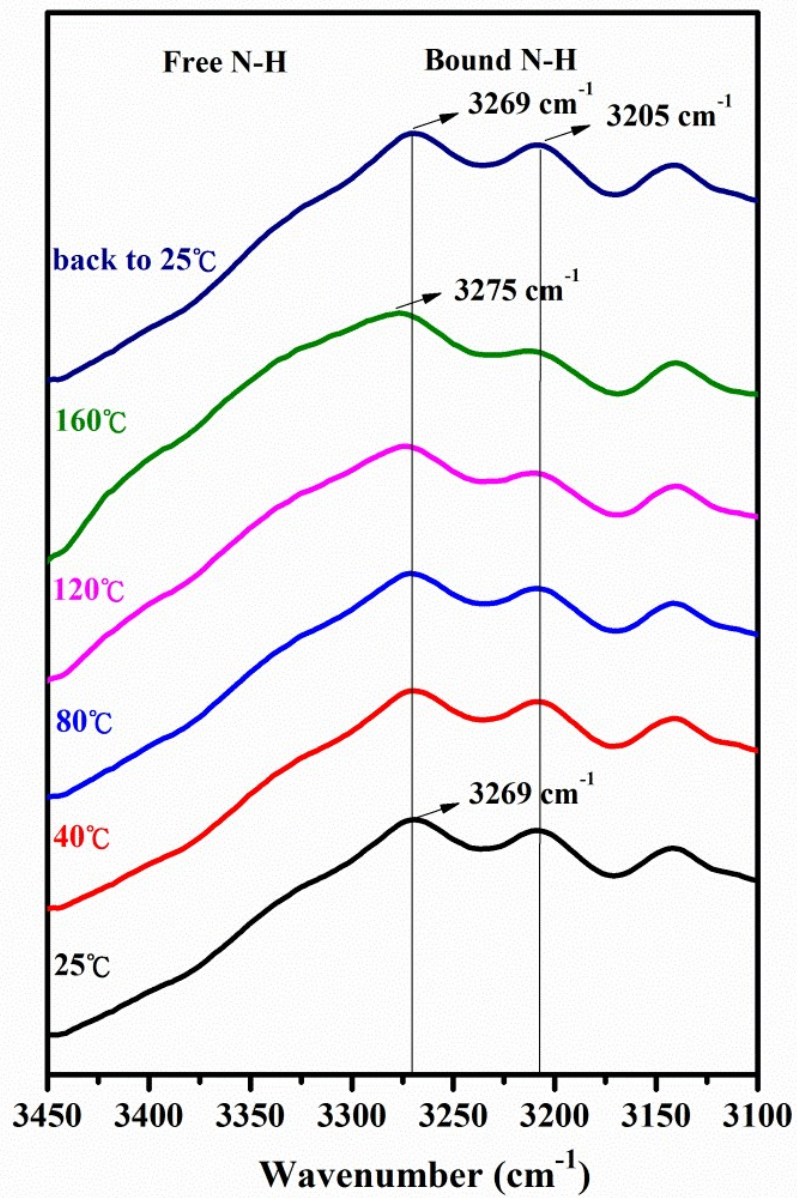

**Fig. S5:** Variable-temperature FTIR spectra of the PVB-DAP/Azo-T (2/1) blend system.

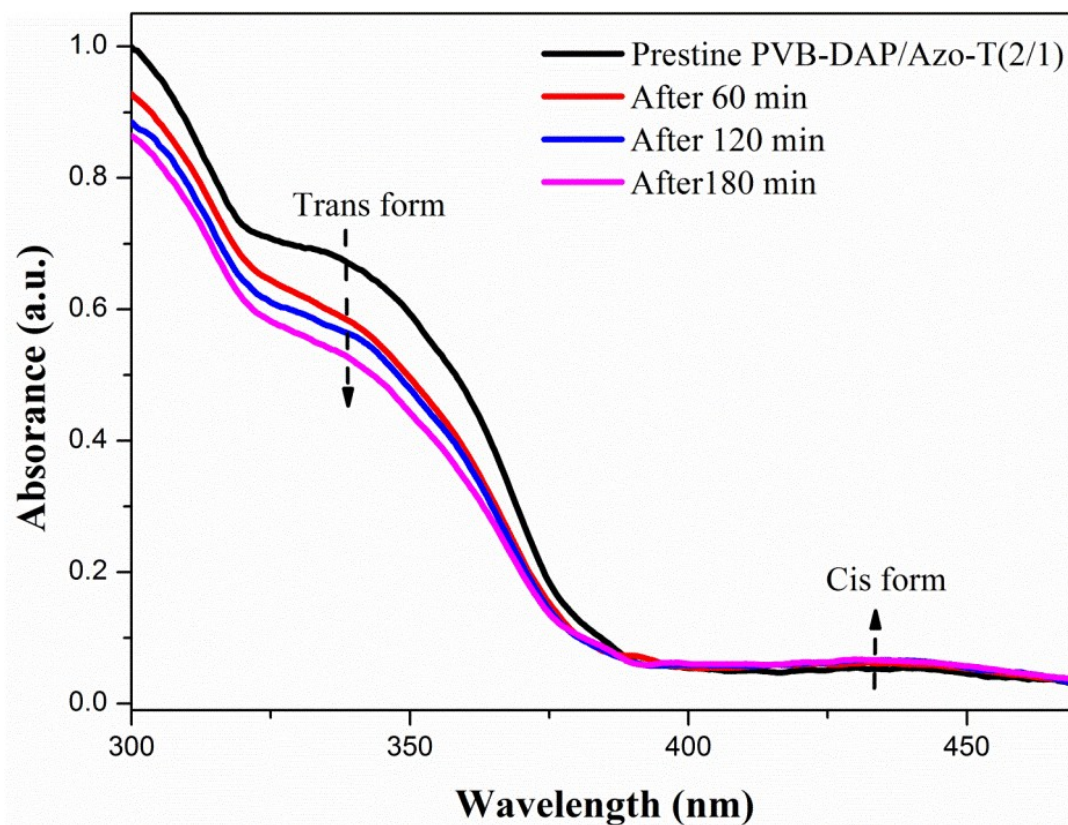

**Fig. S6:** UV-Vis spectra of the supramolecular complex PVB-DAP/Azo-T (2/1) blend thin film illumination under 365 nm UV for different time.

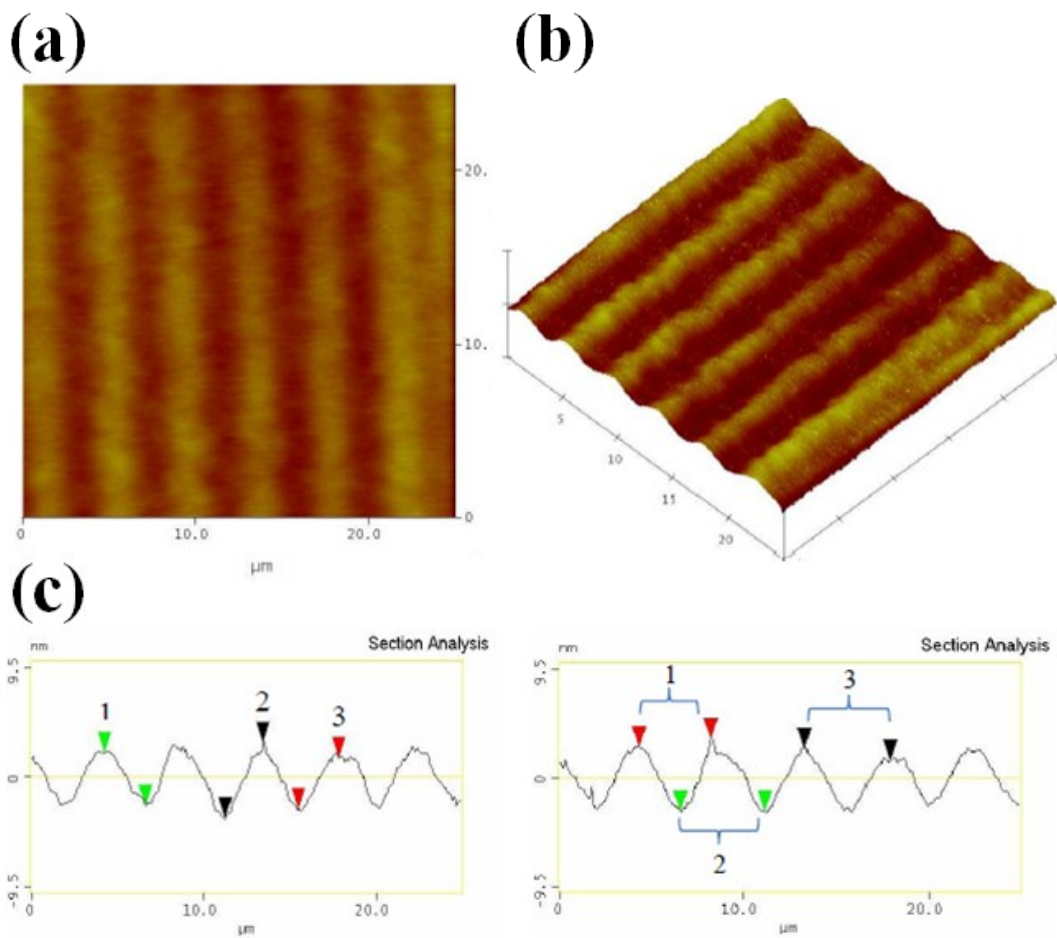

**Fig. S7:** AFM images of surface relief structures: (a) flattened image, (b) 3D image, and (c) section analysis for calculation of the thickness.



## Mass Spectrum SmartFormula Report

### Analysis Info

Analysis Name D:\Data\c7\AZOT\_000009.d  
Method broadband first signal  
Sample Name Azo-T  
Comment ESI Positive

7/16/2015 1:14:03 PM

Instrument: FT-MS solariX

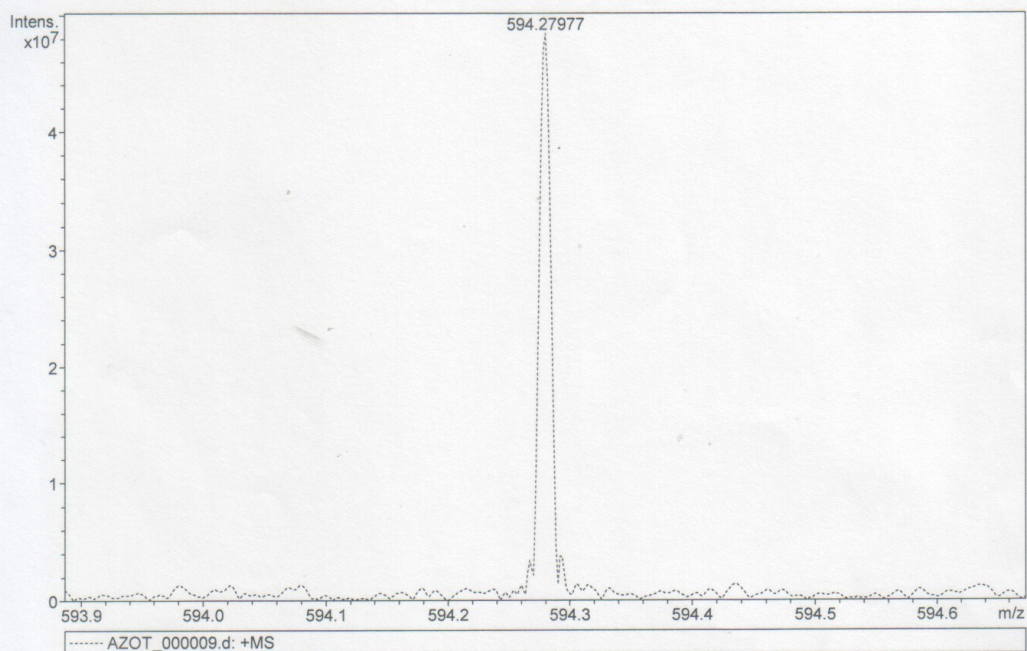

| Meas. m/z | # | Formula              | Score  | m/z       | err [mDa] | err [ppm] | mSigma | rdb  | e <sup>-</sup> Conf | N-Rule |
|-----------|---|----------------------|--------|-----------|-----------|-----------|--------|------|---------------------|--------|
| 594.27977 | 1 | C 31 H 37 N 7 Na O 4 | 100.00 | 594.27992 | 0.15      | 0.26      | 46.2   | 16.5 | even                | ok     |

**Fig. S8:** ESI mass spectrum of Azo-T.

## Mass Spectrum SmartFormula Report

### Analysis Info

Analysis Name D:\Data\c7\sadap\_000009.d  
Method broadband first signal  
Sample Name SA-DAP  
Comment ESI Positive

7/16/2015 12:42:22 PM  
Instrument: FT-MS solariX

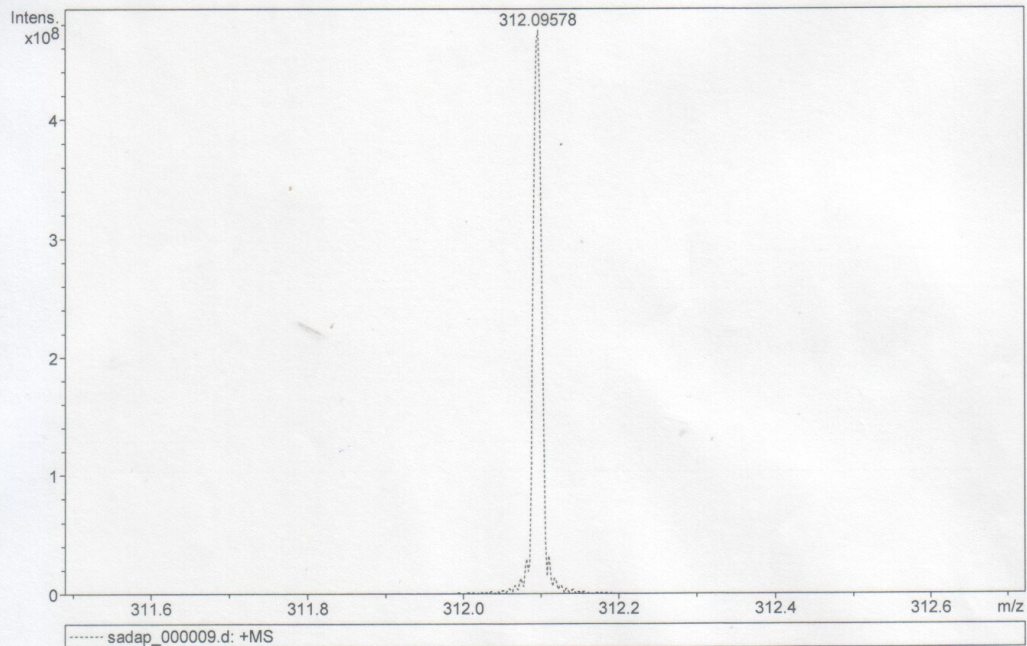

| Meas. m/z | # | Formula              | Score  | m/z       | err [mDa] | err [ppm] | mSigma | rdb | e <sup>-</sup> Conf | N-Rule |
|-----------|---|----------------------|--------|-----------|-----------|-----------|--------|-----|---------------------|--------|
| 312.09578 | 1 | C 14 H 15 N 3 Na O 4 | 100.00 | 312.09548 | -0.30     | -0.97     | 3.3    | 8.5 | even                | ok     |

**Fig. S9:** ESI mass spectrum of SA-DAP.
